# Supplementary material for: Impaired ECM Remodeling and Macrophage Activity Define Necrosis and Regeneration Following Damage in Aged Skeletal Muscle
Source: MDPI journal article supplement (doi:10.3390/ijms21134575), 2020-06-27
Supplement: s1 [file s1]

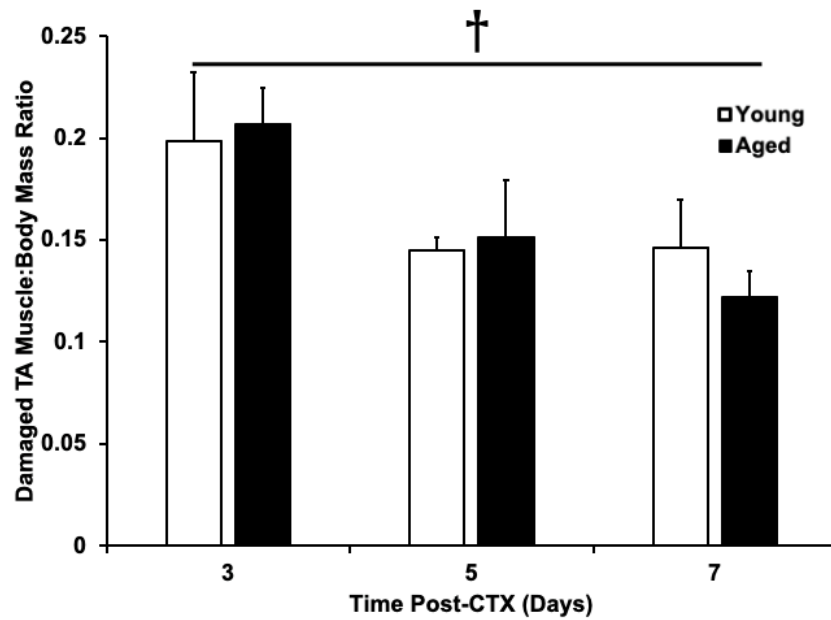

**Supplementary Figure 1.** Damaged TA muscle mass relative to body mass decreased over time in both groups. No differences in muscle mass to body mass ratio between young and aged groups was observed ( $p > 0.05$ ). † denotes a significant main effect of recovery time point following damage ( $p < 0.001$ ).

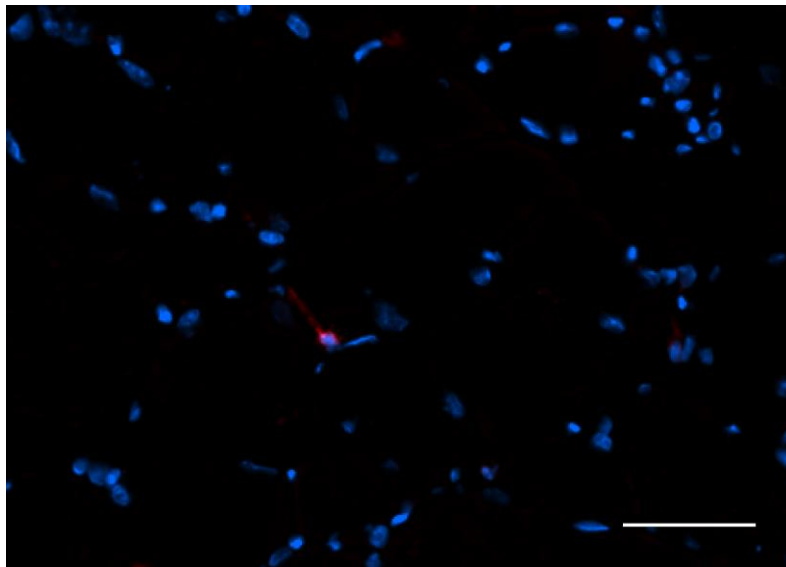

**Supplementary Figure 2.** F4/80 (red) and DAPI (blue) staining of young undamaged skeletal muscle. Virtually no F4/80 positive cells are present within young undamaged skeletal muscle. Scale bar represents 50 $\mu$ m.

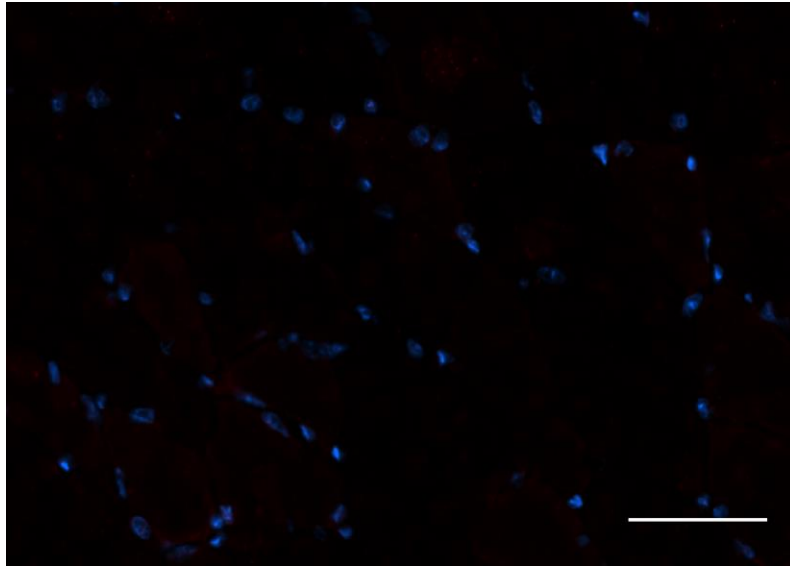

**Supplementary Figure 3.** MMP-9 (red) and DAPI (blue) staining of young undamaged skeletal muscle. MMP-9 is not present in undamaged skeletal muscle. Scale bar represents 50 $\mu$ m.
