# Supplementary material for: Impaired ECM Remodeling and Macrophage Activity Define Necrosis and Regeneration Following Damage in Aged Skeletal Muscle
Source: Int J Mol Sci. 2020 Jun 27;21(13):4575. doi: 10.3390/ijms21134575 (PMC7369722; doi:10.3390/ijms21134575)
Supplement: Supplementary file 1 [file ijms-21-04575-s001.zip › supplementary 2.xlsx]

## Sheet: Sheet1
Body Mass Data - Results Section	Independent Samples Test
			Levene's Test for Equality of Variances		t-test for Equality of Means
			F	Sig.	t	df	Sig. (2-tailed)	Mean Difference	Std. Error Difference	95% Confidence Interval of the Difference
										Lower	Upper
	BodyMass_POST_CTX	Equal variances assumed	2.22	0.147	-8.827	28	0	-6.95933	0.78838	-8.57425	-5.34442
		Equal variances not assumed			-8.827	24.897	0	-6.95933	0.78838	-8.58337	-5.3353
Fig 2B	Independent Samples Test
			Levene's Test for Equality of Variances		t-test for Equality of Means
			F	Sig.	t	df	Sig. (2-tailed)	Mean Difference	Std. Error Difference	95% Confidence Interval of the Difference
										Lower	Upper
	Control_TA_CSA	Equal variances assumed	0.067	0.803	-4.402	7	0.003	-609.958	138.567	-937.617	-282.3
		Equal variances not assumed			-4.48	6.907	0.003	-609.958	136.156	-932.801	-287.116
Fig 2C	Independent Samples Test
			Levene's Test for Equality of Variances		t-test for Equality of Means
			F	Sig.	t	df	Sig. (2-tailed)	Mean Difference	Std. Error Difference	95% Confidence Interval of the Difference
										Lower	Upper
	Control_TA_Mass	Equal variances assumed	2.218	0.148	-6.678	28	0	-0.00993	0.00149	-0.01298	-0.00689
		Equal variances not assumed			-6.678	23.281	0	-0.00993	0.00149	-0.01301	-0.00686
	Tests of Between-Subjects Effects
Nuclei per regenerating myofibre	Dependent Variable: Nuclei
2-way ANOVA	Source	Type III Sum of Squares	df	Mean Square	F	Sig.
	Corrected Model	.425a	3	0.142	16.152	0
	Intercept	27.101	1	27.101	3092.58	0
	Age	0.361	1	0.361	41.249	0
	TimePoint	0.073	1	0.073	8.372	0.013
	Age * TimePoint	0.003	1	0.003	0.377	0.55
	Error	0.114	13	0.009
	Total	27.654	17
	Corrected Total	0.539	16
	a R Squared = .788 (Adjusted R Squared = .740)
	Tests of Between-Subjects Effects
Fig 2D	Dependent Variable: Damaged_TA_Muscle_Mass
2-way ANOVA	Source	Type III Sum of Squares	df	Mean Square	F	Sig.
	Corrected Model	.004a	5	0.001	14.62	0
	Intercept	0.064	1	0.064	1282.8	0
	Age	0.001	1	0.001	15.025	0.001
	TimePoint	0.003	2	0.001	27.195	0
	Age * TimePoint	0	2	9.19e-05	1.841	0.18
	Error	0.001	24	4.992e-05
	Total	0.069	30
	Corrected Total	0.005	29
	a R Squared = .753 (Adjusted R Squared = .701)
Fig 2D Post-Hoc	Multiple Comparisons
	Dependent Variable: Damaged_TA_Muscle_Mass
	Bonferroni
	(I) TimePoint	(J) TimePoint	Mean Difference (I-J)	Std. Error	Sig.	95% Confidence Interval
						Lower Bound	Upper Bound
	3 Day	5 Day	.0165*	0.00316	0	0.0084	0.0246
		7 Day	.0225*	0.00316	0	0.0144	0.0306
	5 Day	3 Day	-.0165*	0.00316	0	-0.0246	-0.0084
		7 Day	0.006	0.00316	0.209	-0.0021	0.0141
	7 Day	3 Day	-.0225*	0.00316	0	-0.0306	-0.0144
		5 Day	-0.006	0.00316	0.209	-0.0141	0.0021
	Based on observed means.
	The error term is Mean Square(Error) = 4.992E-5.
	* The mean difference is significant at the .05 level.
	Tests of Between-Subjects Effects
Fig 2F	Dependent Variable: Mean_eMHC_Myofibre_CSA
2-way ANOVA	Source	Type III Sum of Squares	df	Mean Square	F	Sig.
	Corrected Model	497629.089a	3	165876	11.566	0.001
	Intercept	5.39944e+06	1	5.39944e+06	376.48	0
	Age	138679	1	138679	9.669	0.008
	TimePoint	282362	1	282362	19.688	0.001
	Age * TimePoint	101287	1	101287	7.062	0.02
	Error	186445	13	14341.9
	Total	6.09027e+06	17
	Corrected Total	684074	16
	a R Squared = .727 (Adjusted R Squared = .665)
Fig 2F	Pairwise Comparisons
Simple Main Effects Post-hoc	Dependent Variable: Mean_eMHC_Myofibre_CSA
	TimePoint	(I) Age	(J) Age	Mean Difference (I-J)	Std. Error	Sig.b	95% Confidence Interval for Difference
							Lower Bound	Upper Bound
	5 Day	Young	Aged	26.385	84.681	0.76	-156.558	209.328
		Aged	Young	-26.385	84.681	0.76	-209.328	156.558
	7 Day	Young	Aged	336.582*	80.336	0.001	163.027	510.137
		Aged	Young	-336.582*	80.336	0.001	-510.137	-163.027
	Based on estimated marginal means
	* The mean difference is significant at the .05 level.
	b Adjustment for multiple comparisons: Bonferroni.
Fig 2F	Pairwise Comparisons
Simple Main Effects Post-hoc	Dependent Variable: Mean_eMHC_Myofibre_CSA
	Age	(I) Age	(J) Age	Mean Difference (I-J)	Std. Error	Sig.b	95% Confidence Interval for Difference
							Lower Bound	Upper Bound
	Young	5 Day	7 Day	-414.060*	84.681	0	-597.003	-231.117
		7 Day	5 Day	414.060*	84.681	0	231.117	597.003
	Aged	5 Day	7 Day	-103.863	80.336	0.219	-277.418	69.692
		7 Day	5 Day	103.863	80.336	0.219	-69.692	277.418
	Based on estimated marginal means
	* The mean difference is significant at the .05 level.
	b Adjustment for multiple comparisons: Bonferroni.
	Tests of Between-Subjects Effects
Fig 2G	Dependent Variable: eMHC_Myofibre_Percent_Area
2-way ANOVA	Source	Type III Sum of Squares	df	Mean Square	F	Sig.
	Corrected Model	19061.240a	3	6353.75	20.978	0
	Intercept	70213.2	1	70213.2	231.817	0
	Age	16297.3	1	16297.3	53.807	0
	TimePoint	2537.2	1	2537.2	8.377	0.013
	Age * TimePoint	1116.75	1	1116.75	3.687	0.077
	Error	3937.47	13	302.882
	Total	92496.4	17
	Corrected Total	22998.7	16
	a R Squared = .829 (Adjusted R Squared = .789)
	Tests of Between-Subjects Effects
Fig 3B	Dependent Variable: Necrotic_Tissue_Area_Slide_Scan
2-way ANOVA	Source	Type III Sum of Squares	df	Mean Square	F	Sig.
	Corrected Model	46109.277a	5	9221.85	70.123	0
	Intercept	104108	1	104108	791.639	0
	Age	14309.3	1	14309.3	108.808	0
	TimePoint	22401.9	2	11201	85.172	0
	Age * TimePoint	7443.24	2	3721.62	28.299	0
	Error	2893.2	22	131.509
	Total	150679	28
	Corrected Total	49002.5	27
	a R Squared = .941 (Adjusted R Squared = .928)
Fig 3B	Pairwise Comparisons
Simple Main Effects Post-hoc	Dependent Variable: Necrotic_Tissue_Area_Slide_Scan
	TimePoint	(I) Age	(J) Age	Mean Difference (I-J)	Std. Error	Sig.b	95% Confidence Interval for Differenceb
							Lower Bound	Upper Bound
	3 Day	Young	Aged	-2.842e-14	7.253	1	-15.041	15.041
		Aged	Young	2.842e-14	7.253	1	-15.041	15.041
	5 Day	Young	Aged	-67.455*	7.693	0	-83.409	-51.501
		Aged	Young	67.455*	7.693	0	51.501	83.409
	7 Day	Young	Aged	-68.934*	7.693	0	-84.888	-52.98
		Aged	Young	68.934*	7.693	0	52.98	84.888
	Based on estimated marginal means
	* The mean difference is significant at the .05 level.
	b Adjustment for multiple comparisons: Bonferroni.
Fig 3B	Pairwise Comparisons
Simple Main Effects Post-hoc	Dependent Variable: Necrotic_Tissue_Area_Slide_Scan
	Age	(I) TimePoint	(J) TimePoint	Mean Difference (I-J)	Std. Error	Sig.b	95% Confidence Interval for Differenceb
							Lower Bound	Upper Bound
	Young	3 Day	5 Day	84.837*	7.253	0	66.043	103.63
			7 Day	99.415*	7.253	0	80.621	118.209
		5 Day	3 Day	-84.837*	7.253	0	-103.63	-66.043
			7 Day	14.578	7.253	0.171	-4.215	33.372
		7 Day	3 Day	-99.415*	7.253	0	-118.209	-80.621
			5 Day	-14.578	7.253	0.171	-33.372	4.215
	Aged	3 Day	5 Day	17.381	7.693	0.102	-2.552	37.315
			7 Day	30.481*	7.693	0.002	10.547	50.415
		5 Day	3 Day	-17.381	7.693	0.102	-37.315	2.552
			7 Day	13.1	8.109	0.361	-7.912	34.111
		7 Day	3 Day	-30.481*	7.693	0.002	-50.415	-10.547
			5 Day	-13.1	8.109	0.361	-34.111	7.912
	Based on estimated marginal means
	* The mean difference is significant at the .05 level.
	b Adjustment for multiple comparisons: Bonferroni.
Fig 4B	Independent Samples Test
2-way ANOVA			Levene's Test for Equality of Variances		t-test for Equality of Means
			F	Sig.	t	df	Sig. (2-tailed)	Mean Difference	Std. Error Difference	95% Confidence Interval of the Difference
										Lower	Upper
	Collagen1_Control_Area	Equal variances assumed	0.172	0.691	-3.903	7	0.006	-0.05977	0.01531	-0.09597	-0.02356
		Equal variances not assumed			-3.736	5.213	0.012	-0.05977	0.016	-0.10038	-0.01915
Fig 4C	Tests of Between-Subjects Effects
2-way ANOVA	Dependent Variable: Collagen1_Area_Necrotic_Region
	Source	Type III Sum of Squares	df	Mean Square	F	Sig.
	Corrected Model	.253a	3	0.084	5.778	0.007
	Intercept	3.28	1	3.28	225.12	0
	Age	0.205	1	0.205	14.053	0.002
	TimePoint	0.002	1	0.002	0.138	0.715
	Age * TimePoint	0.046	1	0.046	3.141	0.095
	Error	0.233	16	0.015
	Total	3.766	20
	Corrected Total	0.486	19
	a R Squared = .520 (Adjusted R Squared = .430)
Fig 4D	Tests of Between-Subjects Effects
2-way ANOVA	Dependent Variable: Collagen1_Area_Regenerating_Region
	Source	Type III Sum of Squares	df	Mean Square	F	Sig.
	Corrected Model	.063a	3	0.021	2.616	0.104
	Intercept	2.443	1	2.443	302.184	0
	Age	0.008	1	0.008	1.042	0.329
	TimePoint	0.009	1	0.009	1.17	0.302
	Age * TimePoint	0.047	1	0.047	5.856	0.034
	Error	0.089	11	0.008
	Total	2.943	15
	Corrected Total	0.152	14
	a R Squared = .416 (Adjusted R Squared = .257)
Fig 4D	Pairwise Comparisons
Simple Main Effects Post-hoc	Dependent Variable: Collagen1_Area_Regenerating_Region
	TimePoint	(I) Age	(J) Age	Mean Difference (I-J)	Std. Error	Sig.b	95% Confidence Interval for Differenceb
							Lower Bound	Upper Bound
	5 Day	Young	Aged	0.07	0.075	0.373	-0.096	0.235
		Aged	Young	-0.07	0.075	0.373	-0.235	0.096
	7 Day	Young	Aged	-.172*	0.066	0.024	-0.316	-0.027
		Aged	Young	.172*	0.066	0.024	0.027	0.316
	Based on estimated marginal means
	* The mean difference is significant at the .05 level.
	b Adjustment for multiple comparisons: Bonferroni.
Fig 4D	Pairwise Comparisons
Simple Main Effects Post-hoc	Dependent Variable: Collagen1_Area_Regenerating_Region
	Age	(I) TimePoint	(J) TimePoint	Mean Difference (I-J)	Std. Error	Sig.a	95% Confidence Interval for Differencea
							Lower Bound	Upper Bound
	Young	5 Day	7 Day	0.067	0.057	0.265	-0.058	0.192
		7 Day	5 Day	-0.067	0.057	0.265	-0.192	0.058
	Aged	5 Day	7 Day	-0.175	0.082	0.057	-0.355	0.006
		7 Day	5 Day	0.175	0.082	0.057	-0.006	0.355
	Based on estimated marginal means
	a Adjustment for multiple comparisons: Bonferroni.
Fig 5B	Independent Samples Test
2-way ANOVA			Levene's Test for Equality of Variances		t-test for Equality of Means
			F	Sig.	t	df	Sig. (2-tailed)	Mean Difference	Std. Error Difference	95% Confidence Interval of the Difference
										Lower	Upper
	Collagen4_Control_Area	Equal variances assumed	0.701	0.43	-0.222	7	0.83	-0.00482	0.02166	-0.05605	0.04641
		Equal variances not assumed			-0.209	4.577	0.844	-0.00482	0.02309	-0.06587	0.05624
Fig 5C	Tests of Between-Subjects Effects
2-way ANOVA	Dependent Variable: Collagen4_Area_Necrotic_Region
	Source	Type III Sum of Squares	df	Mean Square	F	Sig.
	Corrected Model	.008a	3	0.003	0.616	0.617
	Intercept	2.505	1	2.505	597.591	0
	Age	0.007	1	0.007	1.584	0.23
	TimePoint	0	1	0	0.113	0.742
	Age * TimePoint	0.002	1	0.002	0.377	0.55
	Error	0.055	13	0.004
	Total	2.637	17
	Corrected Total	0.062	16
	a R Squared = .124 (Adjusted R Squared = -.078)
Fig 5D	Tests of Between-Subjects Effects
2-way ANOVA	Dependent Variable: Collagen4_Area_Regenerating_Region
	Source	Type III Sum of Squares	df	Mean Square	F	Sig.
	Corrected Model	.012a	3	0.004	1.079	0.392
	Intercept	1.983	1	1.983	540.671	0
	Age	0.005	1	0.005	1.416	0.255
	TimePoint	0.004	1	0.004	0.957	0.346
	Age * TimePoint	0.009	1	0.009	2.436	0.143
	Error	0.048	13	0.004
	Total	2.51	17
	Corrected Total	0.06	16
	a R Squared = .199 (Adjusted R Squared = .015)
Fig 5F	Tests of Between-Subjects Effects
2-way ANOVA	Dependent Variable: Basement_Membrane_Thickness
	Source	Type III Sum of Squares	df	Mean Square	F	Sig.
	Corrected Model	26.524a	3	8.841	37.306	0
	Intercept	453.094	1	453.094	1911.83	0
	Age	25.222	1	25.222	106.423	0
	TimePoint	0.014	1	0.014	0.057	0.815
	Age * TimePoint	1.844	1	1.844	7.78	0.015
	Error	3.081	13	0.237
	Total	496.553	17
	Corrected Total	29.605	16
	a R Squared = .896 (Adjusted R Squared = .872)
Fig 5F	Pairwise Comparisons
Simple Main Effects Post-hoc	Dependent Variable: Basement_Membrane_Thickness
	TimePoint	(I) Age	(J) Age	Mean Difference (I-J)	Std. Error	Sig.b	95% Confidence Interval for Differenceb
							Lower Bound	Upper Bound
	5 Day	Young	Aged	-3.109*	0.344	0	-3.853	-2.366
		Aged	Young	3.109*	0.344	0	2.366	3.853
	7 Day	Young	Aged	-1.786*	0.327	0	-2.491	-1.08
		Aged	Young	1.786*	0.327	0	1.08	2.491
	Based on estimated marginal means
	* The mean difference is significant at the .05 level.
	b Adjustment for multiple comparisons: Bonferroni.
Fig 5F	Pairwise Comparisons
Simple Main Effects Post-hoc	Dependent Variable: Basement_Membrane_Thickness
	Age	(I) TimePoint	(J) TimePoint	Mean Difference (I-J)	Std. Error	Sig.a	95% Confidence Interval for Differencea
							Lower Bound	Upper Bound
	Young	5 Day	7 Day	-0.719	0.344	0.057	-1.462	0.025
		7 Day	5 Day	0.719	0.344	0.057	-0.025	1.462
	Aged	5 Day	7 Day	0.605	0.327	0.087	-0.101	1.31
		7 Day	5 Day	-0.605	0.327	0.087	-1.31	0.101
	Based on estimated marginal means
	a Adjustment for multiple comparisons: Bonferroni.
Fig 6B	Independent Samples Test
2-way ANOVA			Levene's Test for Equality of Variances		t-test for Equality of Means
			F	Sig.	t	df	Sig. (2-tailed)	Mean Difference	Std. Error Difference	95% Confidence Interval of the Difference
										Lower	Upper
	Fibronectin_Control_Area	Equal variances assumed	0.154	0.709	0.256	6	0.806	0.01005	0.03919	-0.08585	0.10595
		Equal variances not assumed			0.245	3.765	0.819	0.01005	0.04106	-0.10683	0.12693
Fig 6C	Tests of Between-Subjects Effects
2-way ANOVA	Dependent Variable: Fibronectin_Area_Necrotic_Region
	Source	Type III Sum of Squares	df	Mean Square	F	Sig.
	Corrected Model	.270a	3	0.09	11.004	0.001
	Intercept	2.445	1	2.445	298.778	0
	Age	0.113	1	0.113	13.79	0.002
	TimePoint	0.186	1	0.186	22.763	0
	Age * TimePoint	0	1	0	0.022	0.885
	Error	0.115	14	0.008
	Total	2.675	18
	Corrected Total	0.385	17
	a R Squared = .702 (Adjusted R Squared = .638)
Fig 6D	Tests of Between-Subjects Effects
2-way ANOVA	Dependent Variable: Fibronectin_Area_Regenerating_Region
	Source	Type III Sum of Squares	df	Mean Square	F	Sig.
	Corrected Model	.037a	3	0.012	2.562	0.104
	Intercept	2.65	1	2.65	553.878	0
	Age	0.017	1	0.017	3.483	0.087
	TimePoint	0.006	1	0.006	1.33	0.271
	Age * TimePoint	0.007	1	0.007	1.424	0.256
	Error	0.057	12	0.005
	Total	3.265	16
	Corrected Total	0.094	15
	a R Squared = .390 (Adjusted R Squared = .238)
Fig 7B	Tests of Between-Subjects Effects
2-way ANOVA	Dependent Variable: F480_Cell_Density_Necrotic_Region
	Source	Type III Sum of Squares	df	Mean Square	F	Sig.
	Corrected Model	1248291.414a	3	416097	2.183	0.132
	Intercept	3.26999e+07	1	3.26999e+07	171.562	0
	Age	1.18666e+06	1	1.18666e+06	6.226	0.025
	TimePoint	11637.3	1	11637.3	0.061	0.808
	Age * TimePoint	15290.3	1	15290.3	0.08	0.781
	Error	2.85902e+06	15	190601
	Total	3.7637e+07	19
	Corrected Total	4.10731e+06	18
	a R Squared = .304 (Adjusted R Squared = .165)
Fig 7C	Tests of Between-Subjects Effects
2-way ANOVA	Dependent Variable: F480_Cell_Density_Regenerating_Region
	Source	Type III Sum of Squares	df	Mean Square	F	Sig.
	Corrected Model	6914865.293a	3	2.30496e+06	28.259	0
	Intercept	1.6777e+07	1	1.6777e+07	205.689	0
	Age	259950	1	259950	3.187	0.094
	TimePoint	590435	1	590435	7.239	0.017
	Age * TimePoint	6.04639e+06	1	6.04639e+06	74.13	0
	Error	1.22347e+06	15	81564.8
	Total	2.62759e+07	19
	Corrected Total	8.13834e+06	18
	a R Squared = .850 (Adjusted R Squared = .820)
Fig 7C	Pairwise Comparisons
Simple Main Effects Post-hoc	Dependent Variable: F480_Cell_Density_Regenerating_Region
	TimePoint	(I) Age	(J) Age	Mean Difference (I-J)	Std. Error	Sig.b	95% Confidence Interval for Differenceb
							Lower Bound	Upper Bound
	5 Day	Young	Aged	898.485*	191.583	0	490.135	1306.84
		Aged	Young	-898.485*	191.583	0	-1306.84	-490.135
	7 Day	Young	Aged	-1368.547*	180.626	0	-1753.54	-983.551
		Aged	Young	1368.547*	180.626	0	983.551	1753.54
	Based on estimated marginal means
	* The mean difference is significant at the .05 level.
	b Adjustment for multiple comparisons: Bonferroni.
Fig 7C	Pairwise Comparisons
Simple Main Effects Post-hoc	Dependent Variable: F480_Cell_Density_Regenerating_Region
	Age	(I) TimePoint	(J) TimePoint	Mean Difference (I-J)	Std. Error	Sig.b	95% Confidence Interval for Differenceb
							Lower Bound	Upper Bound
	Young	5 Day	7 Day	779.302*	180.626	0.001	394.306	1164.3
		7 Day	5 Day	-779.302*	180.626	0.001	-1164.3	-394.306
	Aged	5 Day	7 Day	-1487.730*	191.583	0	-1896.08	-1079.38
		7 Day	5 Day	1487.730*	191.583	0	1079.38	1896.08
	Based on estimated marginal means
	* The mean difference is significant at the .05 level.
	b Adjustment for multiple comparisons: Bonferroni.
Fig 8B	Tests of Between-Subjects Effects
2-way ANOVA	Dependent Variable: MMP9_Percent_Area_Necrotic_Region
	Source	Type III Sum of Squares	df	Mean Square	F	Sig.
	Corrected Model	4.272a	3	1.424	14.753	0
	Intercept	4.839	1	4.839	50.131	0
	Age	1.243	1	1.243	12.881	0.003
	TimePoint	1.622	1	1.622	16.806	0.001
	Age * TimePoint	1.112	1	1.112	11.526	0.004
	Error	1.351	14	0.097
	Total	11.173	18
	Corrected Total	5.623	17
	a R Squared = .760 (Adjusted R Squared = .708)
Fig 8B	Pairwise Comparisons
Simple Main Effects Post-hoc	Dependent Variable: MMP9_Percent_Area_Necrotic_Region
	TimePoint	(I) Age	(J) Age	Mean Difference (I-J)	Std. Error	Sig.b	95% Confidence Interval for Differenceb
							Lower Bound	Upper Bound
	3 Day	Young	Aged	1.029*	0.196	0	0.608	1.451
		Aged	Young	-1.029*	0.196	0	-1.451	-0.608
	5 Day	Young	Aged	0.029	0.22	0.898	-0.443	0.5
		Aged	Young	-0.029	0.22	0.898	-0.5	0.443
	Based on estimated marginal means
	* The mean difference is significant at the .05 level.
	b Adjustment for multiple comparisons: Bonferroni.
Fig 8B	Pairwise Comparisons
Simple Main Effects Post-hoc	Dependent Variable: MMP9_Percent_Area_Necrotic_Region
	Age	(I) TimePoint	(J) TimePoint	Mean Difference (I-J)	Std. Error	Sig.b	95% Confidence Interval for Differenceb
							Lower Bound	Upper Bound
	Young	3 Day	5 Day	1.104*	0.208	0	0.657	1.551
		5 Day	3 Day	-1.104*	0.208	0	-1.551	-0.657
	Aged	3 Day	5 Day	0.104	0.208	0.626	-0.343	0.551
		5 Day	3 Day	-0.104	0.208	0.626	-0.551	0.343
	Based on estimated marginal means
	* The mean difference is significant at the .05 level.
	b Adjustment for multiple comparisons: Bonferroni.
Fig 8C	Tests of Between-Subjects Effects
2-way ANOVA	Dependent Variable: MMP9_Percent_Area_Regenerating_Region
	Source	Type III Sum of Squares	df	Mean Square	F	Sig.
	Corrected Model	.063a	3	0.021	1.33	0.31
	Intercept	0.529	1	0.529	33.741	0
	Age	0.026	1	0.026	1.673	0.22
	TimePoint	0.03	1	0.03	1.912	0.192
	Age * TimePoint	0.058	1	0.058	3.699	0.078
	Error	0.188	12	0.016
	Total	0.796	16
	Corrected Total	0.251	15
	a R Squared = .250 (Adjusted R Squared = .062)
Fig 8D	Tests of Between-Subjects Effects
2-way ANOVA	Dependent Variable: MMP9_F4‎80_Cell_Necrotic_Region
	Source	Type III Sum of Squares	df	Mean Square	F	Sig.
	Corrected Model	4225.427a	3	1408.48	4.132	0.027
	Intercept	10475	1	10475	30.728	0
	Age	371.694	1	371.694	1.09	0.314
	TimePoint	1.613	1	1.613	0.005	0.946
	Age * TimePoint	4073.41	1	4073.41	11.949	0.004
	Error	4772.6	14	340.9
	Total	19574.8	18
	Corrected Total	8998.03	17
	a R Squared = .470 (Adjusted R Squared = .356)
Fig 8D	Pairwise Comparisons
Simple Main Effects Post-hoc	Dependent Variable: MMP9_F4‎80_Cell_Necrotic_Region
	TimePoint	(I) Age	(J) Age	Mean Difference (I-J)	Std. Error	Sig.b	95% Confidence Interval for Differenceb
							Lower Bound	Upper Bound
	3 Day	Young	Aged	-21.129	11.677	0.092	-46.174	3.916
		Aged	Young	21.129	11.677	0.092	-3.916	46.174
	5 Day	Young	Aged	39.419*	13.056	0.009	11.417	67.421
		Aged	Young	-39.419*	13.056	0.009	-67.421	-11.417
	Based on estimated marginal means
	* The mean difference is significant at the .05 level.
	b Adjustment for multiple comparisons: Bonferroni.
Fig 8D	Pairwise Comparisons
Simple Main Effects Post-hoc	Dependent Variable: MMP9_F4‎80_Cell_Necrotic_Region
	Age	(I) TimePoint	(J) TimePoint	Mean Difference (I-J)	Std. Error	Sig.b	95% Confidence Interval for Differenceb
							Lower Bound	Upper Bound
	Young	3 Day	5 Day	-30.877*	12.386	0.026	-57.441	-4.312
		5 Day	3 Day	30.877*	12.386	0.026	4.312	57.441
	Aged	3 Day	5 Day	29.672*	12.386	0.031	3.107	56.236
		5 Day	3 Day	-29.672*	12.386	0.031	-56.236	-3.107
	Based on estimated marginal means
	* The mean difference is significant at the .05 level.
	b Adjustment for multiple comparisons: Bonferroni.
Fig 8E	Tests of Between-Subjects Effects
2-way ANOVA	Dependent Variable: MMP9_F480_Cell_Regenerating_Region
	Source	Type III Sum of Squares	df	Mean Square	F	Sig.
	Corrected Model	3615.188a	3	1205.06	3.782	0.048
	Intercept	19606.2	1	19606.2	61.532	0
	Age	3477.7	1	3477.7	10.914	0.008
	TimePoint	7.287	1	7.287	0.023	0.883
	Age * TimePoint	71.53	1	71.53	0.224	0.646
	Error	3186.32	10	318.632
	Total	31290.1	14
	Corrected Total	6801.51	13
	a R Squared = .532 (Adjusted R Squared = .391)
Fig 9B	Tests of Between-Subjects Effects
2-way ANOVA	Dependent Variable: Extracellular_PAI1_Area_Necrotic_Region
	Source	Type III Sum of Squares	df	Mean Square	F	Sig.
	Corrected Model	740.718a	3	246.906	16.525	0.001
	Intercept	63948.2	1	63948.2	4279.95	0
	Age	716.32	1	716.32	47.942	0
	TimePoint	48.136	1	48.136	3.222	0.11
	Age * TimePoint	85.577	1	85.577	5.728	0.044
	Error	119.531	8	14.941
	Total	74048.6	12
	Corrected Total	860.249	11
	a R Squared = .861 (Adjusted R Squared = .809)
Fig 9B	Pairwise Comparisons
Simple Main Effects Post-hoc	Dependent Variable: Extracellular_PAI1_Area_Necrotic_Region
	TimePoint	(I) Age	(J) Age	Mean Difference (I-J)	Std. Error	Sig.b	95% Confidence Interval for Differenceb
							Lower Bound	Upper Bound
	3 Day	Young	Aged	-10.843*	2.823	0.005	-17.353	-4.334
		Aged	Young	10.843*	2.823	0.005	4.334	17.353
	5 Day	Young	Aged	-22.298*	3.865	0	-31.212	-13.385
		Aged	Young	22.298*	3.865	0	13.385	31.212
	Based on estimated marginal means
	* The mean difference is significant at the .05 level.
	b Adjustment for multiple comparisons: Bonferroni.
Fig 9B	Pairwise Comparisons
Simple Main Effects Post-hoc	Dependent Variable: Extracellular_PAI1_Area_Necrotic_Region
	Age	(I) TimePoint	(J) TimePoint	Mean Difference (I-J)	Std. Error	Sig.b	95% Confidence Interval for Differenceb
							Lower Bound	Upper Bound
	Young	3 Day	5 Day	10.023*	3.234	0.015	2.565	17.481
		5 Day	3 Day	-10.023*	3.234	0.015	-17.481	-2.565
	Aged	3 Day	5 Day	-1.432	3.529	0.696	-9.569	6.705
		5 Day	3 Day	1.432	3.529	0.696	-6.705	9.569
	Based on estimated marginal means
	* The mean difference is significant at the .05 level.
	b Adjustment for multiple comparisons: Bonferroni.
Fig 9C	Tests of Between-Subjects Effects
2-way ANOVA	Dependent Variable: Extracellular_PAI1_Area_Regenerating_Region
	Source	Type III Sum of Squares	df	Mean Square	F	Sig.
	Corrected Model	191.323a	3	63.774	2.17	0.155
	Intercept	71704.6	1	71704.6	2439.43	0
	Age	126.219	1	126.219	4.294	0.065
	TimePoint	49.172	1	49.172	1.673	0.225
	Age * TimePoint	4.203	1	4.203	0.143	0.713
	Error	293.94	10	29.394
	Total	81243.4	14
	Corrected Total	485.263	13
	a R Squared = .394 (Adjusted R Squared = .213)
Fig 9D	Tests of Between-Subjects Effects
2-way ANOVA	Dependent Variable: PAI1_Regenerating_Myocellular_Brightness
	Source	Type III Sum of Squares	df	Mean Square	F	Sig.
	Corrected Model	1361627.278a	3	453876	2.231	0.154
	Intercept	3.35023e+07	1	3.35023e+07	164.648	0
	Age	1.36085e+06	1	1.36085e+06	6.688	0.029
	TimePoint	1046.36	1	1046.36	0.005	0.944
	Age * TimePoint	218654	1	218654	1.075	0.327
	Error	1.8313e+06	9	203478
	Total	4.21012e+07	13
	Corrected Total	3.19293e+06	12
	a R Squared = .426 (Adjusted R Squared = .235)
